# Supplementary material
Source: Research Square preprint supplement (doi:10.21203/rs.3.rs-7618150/v1)
Supplement: Supplementary file 1 [file e2eb171694dbacddd39bde6a.xlsx]

## Sheet: Sheet1
Serial Number	Source	1. Age:	2. Gender:	3. Location (City and Province):	4. Annual Household Income:	5. Educational Level:	6. How often do you purchase sugar?	7. Which types of sugar do you typically purchase?	8. Have you ever purchased Demerara yellow sugar (golden sugar) from Guyana	9. Have you used yellow or golden sugar (e.g., Taikoo Golden Sachets, Demerara yellow sugar)?	10. If you’ve purchased Demerara yellow sugar or golden sugar, what do you usually use it for?	11. Which factors most influence your sugar-purchasing decisions? (Select up to 3)	12. Which packaging design do you find more appealing for sugar products?	13. How likely will you purchase Demerara yellow or golden sugar if the packaging uses bright colors? (1 = Very unlikely, 5 = Very likely)	14. How likely are you to purchase Demerara yellow sugar or golden sugar if it has eco-friendly or recyclable packaging? (1 = Very unlikely, 5 = Very likely)	15. Which colors do you associate with premium quality in sugar products? (Select up to 3)	16. How important is typography (font style) in your decision to buy Demerara yellow sugar or golden sugar? (1 = Not important at all, 5 = Very important)	17. Do you prefer sugar packaging with images or illustrations of the product (e.g., sugar cane, raw sugar)?	18. How likely will you purchase Demerara yellow or golden sugar if it features modern, clean typography versus traditional fonts? (1 = Very unlikely, 5 = Very likely)	19. How important is symbolism (e.g., heritage, culture) in the design of Demerara yellow sugar or golden sugar packaging for you? (1 = Not important at all, 5 = Very important)	20. Would you trust Demerara yellow sugar or golden sugar from Guyana if the packaging emphasizes heritage and traditional farming methods? (1 = Not at all, 5 = Absolutely)	21. Which of the following do you associate with sugar packaging that appears high-end? (Select all that apply)	22. How important is the brand’s story or heritage when purchasing Demerara yellow or golden sugar? (1 = Not at all important, 5 = Extremely important)	23. Would you be more likely to buy Demerara yellow sugar or golden sugar if you knew it was produced using ethical farming practices?	24. How much does foreign branding affect your trust in agricultural products like Demerara yellow or golden sugar? (1 = Does not affect at all, 5 = Significantly affects)	25. Do you trust foreign agricultural brands as much as local brands in China?	26. Which do you trust more?	27. How important is eco-friendly packaging when purchasing Demerara yellow sugar or golden sugar? (1 = Not important at all, 5 = Very important)	28. Would you be more likely to purchase Demerara yellow or golden sugar if the packaging included a QR code for product traceability and sustainability details?	29. How likely are you to purchase Demerara yellow sugar or golden sugar if it features blockchain verification on the packaging to confirm its authenticity? (1 = Very unlikely, 5 = Very likely)	30. How likely are you to purchase a product from a brand that promotes sustainability and transparency in its branding and packaging? (1 = Very unlikely, 5 = Very likely)
1	微信	18 - 24 years old	Prefer not to disclose	Guangzhou	<200,000	Postgraduate or professional degree	Rarely	White sugar	No	No	Not purchased	Health attributes (e.g., organic, non - GMO)	Minimalist Design	3	3	Gold	2	No	4	1	4	Brand Trust and Storytelling	4	No	4	No	Local products with Chinese certifications	4	No	2	2
2	微信	18 - 24 years old	Female	Henan	100,000 – 200,000	Postgraduate or professional degree	Rarely	Rock sugar, white sugar, regular brown sugar	No	No	Not purchased	Certification labels (e.g., organic, fair trade)	Vibrant design	3	4	Red, gold, white	3	Yes	2	4	4	Culturally symbolic design, Brand Trust and Storytelling	4	Yes	4	Yes	Local products with Chinese certifications	4	Yes	4	4
3	微信	18 - 24 years old	Female	Shanghai	<200,000	Postgraduate or professional degree	Weekly	Brown sugar	No	Yes	Tea (e.g., ginger tea, brown sugar water)	Health attributes (e.g., organic, non - GMO)	Minimalist Design	3	4	Gold, White	5	No	4	4	5	Metallic colors (gold/silver), Minimalistic Design, brand trust and storytelling	4	Yes	5	No	Imported products with international certifications (e.g., organic, fair trade)	5	Yes	5	5
4	微信	25 - 34 years old	Male	Wuxi	100,000 – 200,000	High school and below	Rarely	White sugar	No	Yes	Coffee	Price	Minimalist Design	3	3	White	3	Yes	3	5	3	Transparent packaging	3	Uncertain	3	Sometimes	Sustainability and digitalization	3	Maybe	3	3
5	微信	25 - 34 years old	Female	Shenzhen	<200,000	Postgraduate or professional degree	Rarely	White sugar	No	Yes	Tea (e.g., ginger tea, brown sugar water)	Brand reputation	Minimalist Design	2	3	White	3	No	4	4	4	Minimalistic design , Transparent packaging	3	Yes	4	Sometimes	Imported products with international certifications (e.g., organic, fair trade)	3	Yes	4	4
6	微信	25 - 34 years old	Female	Wuxi	100,000 – 200,000	Postgraduate or professional degree	Rarely	Yellow sugar/Golden sugar (e.g., Taikoo Golden Sachets, Demerara yellow sugar)	No	Yes	Baking	Packaging/visual appeal	Vibrant design	4	4	Red, gold	4	Yes	4	3	4	Metallic colors (gold, silver), Premium material packaging (e.g., glass, premium paper), Transparent packaging	4	No	4	Yes	Local products with Chinese certifications	4	No	4	4
7	微信	35 - 44 years old	Male	Harbin	100,000 – 200,000	Postgraduate or professional degree	Rarely	White sugar, regular brown sugar	No	Yes	Not purchased	Brand reputation	Minimalist Design	2	4	Gold, white	4	No	4	3	4	Minimalistic design, Brand Trust and Storytelling	4	Uncertain	4	Sometimes	Imported products with international certifications (e.g., organic, fair trade)	4	Maybe	4	3
8	微信	25 - 34 years old	Female	Hangzhou	<200,000	Postgraduate or professional degree	Rarely	Yellow sugar/Golden sugar (e.g., Taikoo Golden Sachets, Demerara yellow sugar)	No	Yes	Baking	Flavor/quality	Vibrant design	5	5	Red	5	Yes	3	5	5	Transparent Packaging, Culturally symbolic design, Brand Trust and Storytelling	5	Uncertain	5	No	Imported products with international certifications (e.g., organic, fair trade)	5	Yes	5	5
9	微信	25 - 34 years old	Female	Wuxi	100,000 – 200,000	Postgraduate or professional degree	Rarely	Regular brown sugar, Black sugar	No	Yes	Not purchased	Flavor/quality	Modern design	5	3	Red, gold, purple, black	3	No	5	3	5	Metallic Colors (Gold/Silver), Minimalistic Design,Culturally symbolic design	3	Yes	3	Yes	Sustainability and digitalization	3	Yes	3	5
10	微信	18 - 24 years old	Prefer not to disclose	Wuxi	<200,000	Undergraduate	Rarely	Zero - calorie sweetener	No	Yes	Cooking (e.g., braised pork, sweet and sour ribs)	Brand reputation	Traditional design	3	3	Red, gold	4	No	4	4	4	Culturally symbolic design , Brand Trust and Storytelling	4	Uncertain	4	Sometimes	Imported products with international certifications (e.g., organic, fair trade)	2	Maybe	4	4
11	微信	45 - 54 years old	Female	Wuxi	< 200,000	Postgraduate or professional degree	Rarely	Rock sugar, white sugar, regular brown sugar	No	Yes	Not purchased	Health attributes (e.g., organic, non - GMO)	Vibrant design	4	4	Red, gold	3	Yes	4	4	5	Minimalistic Design, Premium material packaging (e.g., glass, premium paper) Culturally symbolic design, Brand Trust and Storytelling	5	Yes	4	Sometimes	Imported products with international certifications (e.g., organic, fair trade)	3	Maybe	5	4
12	微信	25 - 34 years old	Female	Zhejiang	100,000 – 200,000	Postgraduate or professional degree	Rarely	White sugar	No	No	baking, Tea (e.g., ginger tea, brown sugar water)	Flavor/quality+M14	Modern design	4	4	Red	4	Yes	4	4	4	Culturally symbolic design, Brand Trust and Storytelling	4	Yes	3	No	Imported products with international certifications (e.g., organic, fair trade)	3	Yes	4	4
13	微信	18 - 24 years old	Female	Wuxi	>50,000	Undergraduate	Rarely	Rock sugar, white sugar	No	No	Not purchased	Price, Flavor/quality, Health benefits (e.g., organic, non-GMO)	Modern design	3	4	White	2	Yes	3	5	4	Minimalistic Design, Premium material packaging (e.g., glass, premium paper), Transparent Packaging, Culturally symbolic design, Brand Trust and Storytelling	4	Yes	3	No	Sustainability and digitalization	4	Yes	3	4
14	微信	18 - 24 years old	Female	Wuxi	< 200,000	Undergraduate	Monthly	White sugar	No	No	Tea (e.g., ginger tea, brown sugar water)	Price, Brand Reputation, Health benefits (e.g., organic, non-GMO)	Minimalist Design	3	3	Gold	3	No	4	2	3	Transparent Packaging, Brand Trust and Storytelling	2	Yes	2	Yes	Sustainability and digitalization	2	Yes	2	4
15	微信	18 - 24 years old	Male	Shanghai	< 200,000	Undergraduate	Monthly	White sugar	No	No	Tea (e.g., ginger tea, brown sugar water)	Price, Brand Reputation, Flavor/quality, Country of origin	Vibrant design	3	3	purple, white, blue	3	Yes	3	5	1	Minimalistic Design	3	No	5	Sometimes	Imported products with international certifications (e.g., organic, fair trade)	1	No	3	3
16	微信	18 - 24 years old	Female	Wuxi	100,000 – 200,000	Undergraduate	Monthly	Rock sugar, white sugar, regular brown sugar	No	Yes	Tea (e.g., ginger tea, brown sugar water)	Brand Reputation, Packaging/visual appeal	Minimalist Design	2	4	gold, white	2	Yes	2	2	4	Minimalistic Design, Premium material packaging (e.g., glass, premium paper), Culturally symbolic design	2	Yes	2	No	Local products with Chinese certifications	2	Yes	2	2
17	微信	18 - 24 years old	Female	Wuxi	>50,000	Undergraduate	Monthly	White sugar	No	No	Not purchased	Brand Reputation, Health benefits (e.g., organic, non-GMO), Certifications (e.g., organic, fair trade)	Minimalist Design	3	2	Gold	2	Yes	2	2	2	Minimalistic Design , Culturally symbolic design , Brand Trust and Storytelling	2	Yes	2	Yes	Imported products with international certifications (e.g., organic, fair trade)	2	Maybe	1	1
18	微信	18 - 24 years old	Female	Wuxi	< 200,000	Undergraduate	Monthly	white sugar, regular brown sugar	No	Yes	Tea (e.g., ginger tea, brown sugar water)	Price, Flavor/quality, Health benefits (e.g., organic, non-GMO), Certifications (e.g., organic, fair trade)	Traditional design	4	5	Red, gold, purple, blue	2	Yes	2	5	4	Premium material packaging (e.g., glass, premium paper) , , Culturally symbolic design , Brand Trust and Storytelling	5	Yes	4	Yes	Imported products with international certifications (e.g., organic, fair trade)	4	Yes	4	4
19	微信	18 - 24 years old	Female	Hainan	>50,000	Undergraduate	Monthly	Rock sugar, white sugar, regular brown sugar	Uncertain	No	Not purchased	Price, Brand Reputation, Flavor/quality	Minimalist Design	3	4	Red, black, white	4	Yes	4	4	4	Metallic Colors (Gold/Silver) , Minimalistic Design , Transparent Packaging	4	Uncertain	4	No	Local products with Chinese certifications	4	Maybe	4	4
20	微信	18 - 24 years old	Female	Wuxi	100,000 – 200,000	Postgraduate or professional degree	Rarely	Regular brown sugar	No	No	Tea (e.g., ginger tea, brown sugar water)	Price, Flavor/quality, Health benefits (e.g., organic, non-GMO)	Modern design	3	4	Red, white	4	Yes	4	4	4	Culturally symbolic design , Brand Trust and Storytelling	4	Uncertain	3	No	Sustainability and digitalization	4	Yes	3	4
21	微信	18 - 24 years old	Female	Wuxi	100,000 – 200,000	Undergraduate	Monthly	Rock sugar, white sugar, regular brown sugar	No	Yes	Tea (e.g., ginger tea, brown sugar water)	Price, Brand Reputation, Flavor/quality, Health benefits (e.g., organic, non-GMO), Packaging/visual appeal	Minimalist Design	3	5	Gold, black, white	5	No	4	5	2	Minimalistic Design , Culturally symbolic design , Brand Trust and Storytelling	3	Yes	4	Yes	Sustainability and digitalization	5	Maybe	3	5
22	微信	18 - 24 years old	Female	Wuxi	100,000 – 200,000	Postgraduate or professional degree	Rarely	don’t buy	No	No	Not purchased	Price, Flavor/quality, Health benefits (e.g., organic, non-GMO)	Traditional design	3	4	Red, gold, black	3	Yes	4	4	4	Metallic Colors (Gold/Silver) , Minimalistic Design , Premium material packaging (e.g., glass, premium paper) , Brand Trust and Storytelling	3	Yes	3	No	Sustainability and digitalization	4	Yes	4	4
23	微信	18 - 24 years old	Male	Wuxi	>50,000	Undergraduate	Rarely	White sugar	No	No	Not purchased	Price, Brand Reputation, Health benefits (e.g., organic, non-GMO)	Minimalist Design	3	3	blue	3	Yes	3	4	4	Premium material packaging (e.g., glass, premium paper), Culturally symbolic design , Brand Trust and Storytelling	3	Uncertain	3	Sometimes	Local products with Chinese certifications	3	Yes	2	3
24	微信	18 - 24 years old	Male	Jiangxi, Ganzhou	< 200,000	Postgraduate or professional degree	Rarely	White sugar	No	No	Tea (e.g., ginger tea, brown sugar water)	Packaging/visual appeal, Flavor/quality, Certifications (e.g., organic, fair trade)	Vibrant design	2	3	Red, gold	3	No	3	3	3	Minimalistic Design , Transparent Packaging	3	No	3	No	Local products with Chinese certifications	3	No	3	3
25	微信	25 - 34 years old	Male	Beijing	< 200,000	Postgraduate or professional degree	Rarely	Regular brown sugar	Uncertain	No	baking, Tea (e.g., ginger tea, brown sugar water)	Packaging/visual appeal, Health benefits (e.g., organic, non-GMO)	Vibrant design	3	3	Green	3	Yes	5	3	3	Premium material packaging (e.g., glass, premium paper), , Transparent Packaging	3	No	3	No	Local products with Chinese certifications	3	No	3	3
26	微信	18 - 24 years old	Female	Wuxi	>50,000	Undergraduate	Monthly	Rock sugar, regular brown sugar, Yellow sugar/Golden sugar (e.g., Taikoo Golden Sachets, Demerara yellow sugar), black sugar	Uncertain	Yes	Cooking (e.g., braised pork, sweet and sour ribs), Tea (e.g., ginger tea, brown sugar water)	Price, Brand Reputation	Modern design	1	5	Red, gold, white	3	Yes	3	3	3	Metallic Colors (Gold/Silver), Premium material packaging (e.g., glass, premium paper)	3	Yes	5	No	Imported products with international certifications (e.g., organic, fair trade)	3	Yes	3	3
27	微信	18 - 24 years old	Female	Wuxi	< 200,000	Undergraduate	Rarely	Rock sugar	No	Yes	Tea (e.g., ginger tea, brown sugar water)	Price,Brand Reputation, Flavor/quality	Minimalist Design	3	4	Red, gold, white	3	Yes	3	3	4	Minimalistic Design, Premium material packaging (e.g., glass, premium paper) , Culturally symbolic design	2	Yes	3	Yes	Local products with Chinese certifications	4	Yes	4	5
28	微信	18 - 24 years old	Female	Wuxi	>50,000	Undergraduate	Rarely	Rock sugar	No	Yes	Tea (e.g., ginger tea, brown sugar water)	Price, Brand Reputation, Flavor/quality	Minimalist Design	3	3	Gold	3	Yes	3	3	3	Minimalistic Design , Premium material packaging (e.g., glass, premium paper)	4	Yes	3	Sometimes	Imported products with international certifications (e.g., organic, fair trade)	3	Yes	4	4
29	微信	18 - 24 years old	Female	Chengdu	>50,000	Undergraduate	Rarely	Regular brown sugar	No	No	Not purchased	Price, Brand Reputation, Flavor/quality	Vibrant design	4	3	Red, gold, purple, black, blue	4	Yes	2	2	3	Metallic Colors (Gold/Silver) , Minimalistic Design, Premium material packaging (e.g., glass, premium paper) , Brand Trust and Storytelling	4	Uncertain	3	No	Local products with Chinese certifications	1	Yes	4	4
30	微信	25 - 34 years old	Male	Wuxi	< 200,000	Postgraduate or professional degree	Never	Rock sugar	No	Yes	Tea (e.g., ginger tea, brown sugar water)	Price, Brand Reputation, Packaging/visual appeal	Minimalist Design	1	1	Red, gold, purple	4	Yes	2	5	3	Minimalistic Design , Transparent Packaging	2	No	2	No	Local products with Chinese certifications	4	No	4	3
31	微信	18 - 24 years old	Female	Wuxi	100,000 – 200,000	Undergraduate	Monthly	Rock sugar, white sugar	No	No	Not purchased	Price, Brand Reputation, Flavor/quality	Traditional design	2	4	Red, gold	4	Yes	2	4	4	Metallic Colors (Gold/Silver) , Culturally symbolic design , Brand Trust and Storytelling	4	Yes	3	Sometimes	Local products with Chinese certifications	3	Yes	4	4
32	微信	35 - 44 years old	Male	Guangzhou	>50,000	Undergraduate	Rarely	White sugar	No	No	Not purchased	Price, Flavor/quality, Country of origin	Traditional design	1	1	Red, gold	5	Yes	5	5	5	Minimalistic Design , Culturally symbolic design , Brand Trust and Storytelling	5	Uncertain	5	Yes	Local products with Chinese certifications	5	Yes	5	5
33	微信	18 - 24 years old	Female	Wuxi	< 200,000	Undergraduate	Monthly	White sugar, regular brown sugar	No	No	Not purchased	Price, Flavor/quality, Health benefits (e.g., organic, non-GMO)	Modern design	4	2	Gold	4	Yes	3	3	4	Minimalistic Design , Brand Trust and Storytelling	4	Yes	4	No	Imported products with international certifications (e.g., organic, fair trade)	3	Yes	4	4
34	微信	18 - 24 years old	Other	Henan	< 200,000	Undergraduate	Rarely	confectionery	No	No	Not purchased	Price, Brand Reputation, Flavor/quality	Modern design	3	3	Gold, purple, green, black, white, blue	5	Yes	3	1	3	Premium material packaging (e.g., glass, premium paper), , Culturally symbolic design	3	Yes	4	Sometimes	Imported products with international certifications (e.g., organic, fair trade)	1	No	3	3
35	微信	18 - 24 years old	Female	Shanghai	100,000 – 200,000	Undergraduate	Monthly	Regular brown sugar, Black sugar	Yes	Yes	baking, Tea (e.g., ginger tea, brown sugar water)	Price, Brand Reputation	Minimalist Design	3	3	Gold	3	Yes	4	2	3	Minimalistic Design , Transparent Packaging , Culturally symbolic design	4	Uncertain	4	Sometimes	Imported products with international certifications (e.g., organic, fair trade)	3	Yes	4	3
36	微信	18 - 24 years old	Female	Wuxi	>50,000	Undergraduate	Rarely	Rock sugar, white sugar	No	No	Not purchased	Price, Flavor/quality, Health benefits (e.g., organic, non-GMO), Packaging/visual appeal	Minimalist Design	2	2	Red, white	2	Yes	3	3	3	Minimalistic Design, Premium material packaging (e.g., glass, premium paper) , Transparent Packaging	2	Uncertain	2	Sometimes	Local products with Chinese certifications	2	Yes	4	5
37	微信	18 - 24 years old	Female	Wuxi	>50,000	Postgraduate or professional degree	Rarely	Rock sugar, white sugar, regular brown sugar, Yellow sugar/Golden sugar (e.g., Taikoo Golden Sachets, Demerara yellow sugar)	No	Yes	baking, Tea (e.g., ginger tea, brown sugar water)	Price, Flavor/quality, Certifications (e.g., organic, fair trade)	Minimalist Design	3	3	Red, gold, white	5	Yes	5	3	5	Minimalistic Design ,Premium material packaging (e.g., glass, premium paper)	4	Yes	4	Sometimes	Imported products with international certifications (e.g., organic, fair trade)	4	Yes	5	5
38	微信	18 - 24 years old	Female	Beijing	>50,000	Undergraduate	Rarely	White sugar, regular brown sugar	No	Yes	Tea (e.g., ginger tea, brown sugar water)	Price	Traditional design	2	2	Red, white	3	Yes	3	3	3	Culturally symbolic design , Brand Trust and Storytelling	3	Uncertain	3	No	Local products with Chinese certifications	3	Yes	3	3
39	微信	35 - 44 years old	Female	Wuxi	>50,000	High school and below	Rarely	Rock Sugar, Regular brown sugar, diabetic sugar	Uncertain	Yes	Tea (e.g., ginger tea, brown sugar water)	Health benefits (e.g., organic, non-GMO), Certifications (e.g., organic, fair trade), Sustainability (e.g., eco-friendly packaging)	Minimalist Design	2	3	Red, gold	4	No	3	5	5	Minimalistic Design , Transparent Packaging , Brand Trust and Storytelling	3	Yes	4	Sometimes	Local products with Chinese certifications	5	Maybe	4	4
40	微信	18 - 24 years old	Male	Nanjing	100,000 – 200,000	Postgraduate or professional degree	Rarely	Rock sugar	No	No	Not purchased	Price	Minimalist Design	1	1	Red	1	Yes	2	1	1	Metallic Colors (Gold/Silver) , Minimalistic Design	1	Yes	1	Yes	Imported products with international certifications (e.g., organic, fair trade)	1	Yes	1	1
41	微信	25 - 34 years old	Female	Wuxi	100,000 – 200,000	Postgraduate or professional degree	Monthly	Regular brown sugar	No	No	Not purchased	Brand Reputation, Flavor/quality, Health benefits (e.g., organic, non-GMO), Sustainability (e.g., eco-friendly packaging)	Minimalist Design	4	4	Gold, purple, white	4	Yes	4	4	4	Minimalistic Design , Transparent Packaging	4	No	4	Sometimes	Local products with Chinese certifications	4	Yes	4	4
42	微信	18 - 24 years old	Female	Fujian	100,000 – 200,000	Postgraduate or professional degree	Monthly	White sugar	No	No	Not purchased	Price, Brand Reputation, Packaging/visual appeal, Flavor/quality, Health benefits (e.g., organic, non-GMO)	Minimalist Design	3	3	Gold, white	3	Yes	3	4	4	Premium material packaging (e.g., glass, premium paper) , , Transparent Packaging , Brand Trust and Storytelling	3	Yes	3	No	Local products with Chinese certifications	3	Yes	3	3
43	微信	18 - 24 years old	Female	Nanjing	< 200,000	Postgraduate or professional degree	Monthly	Rock sugar, white sugar, regular brown sugar, black sugar	No	Yes	baking, Cooking (e.g., braised pork, sweet and sour ribs), Tea (e.g., ginger tea, brown sugar water)	Price, Brand Reputation, Flavor/quality, Health benefits (e.g., organic, non-GMO), Country of origin, Sustainability (e.g., eco-friendly packaging)	Modern design	5	5	Red, gold, white	5	No	5	5	5	Minimalistic Design , Premium material packaging (e.g., glass, premium paper , Transparent Packaging , Culturally symbolic design , Brand Trust and Storytelling	5	Uncertain	5	Sometimes	Sustainability and digitalization	5	Maybe	5	5
44	微信	18 - 24 years old	Prefer not to disclose	Wuxi	>50,000	Undergraduate	Never	don’t buy	Uncertain	No	Not purchased	Price, Health benefits (e.g., organic, non-GMO)	Minimalist Design	2	2	purple, white, blue	2	Yes	3	4	3	Minimalistic Design , Transparent Packaging	2	No	3	Yes	Local products with Chinese certifications	2	Yes	2	4
45	微信	25 - 34 years old	Female	Wuxi	100,000 – 200,000	Postgraduate or professional degree	Rarely	White sugar, regular brown sugar	No	Yes	Not purchased	Price, Brand Reputation, Flavor/quality	Traditional design	2	1	Red, gold	3	Yes	3	5	5	Metallic Colors (Gold/Silver) , Transparent Packaging , Brand Trust and Storytelling	4	Uncertain	3	No	Local products with Chinese certifications	3	Yes	5	5
46	微信	18 - 24 years old	Male	Wuxi	100,000 – 200,000	Postgraduate or professional degree	Rarely	When I buy sugar, I just directly buy candies. I don't know what type they belong to…	No	No	Not purchased	Packaging/visual appeal, Flavor/quality	Modern design	2	3	purple, black	3	No	3	2	3	Premium material packaging (e.g., glass, premium paper , Culturally symbolic design , Brand Trust and Storytelling	2	Uncertain	2	Sometimes	Imported products with international certifications (e.g., organic, fair trade)	3	Maybe	3	4
47	微信	18 - 24 years old	Female	Beijing	100,000 – 200,000	Postgraduate or professional degree	Rarely	Rock sugar, white sugar, regular brown sugar	No	Yes	baking, Tea (e.g., ginger tea, brown sugar water)	Price, Brand Reputation, Flavor/quality	Minimalist Design	3	4	Gold	5	No	4	2	4	Minimalistic Design , Premium material packaging (e.g., glass, premium paper	2	Yes	3	Sometimes	Imported products with international certifications (e.g., organic, fair trade)	4	Yes	4	4
48	微信	18 - 24 years old	Female	Beijing	100,000 – 200,000	Postgraduate or professional degree	Monthly	Rock sugar, white sugar, regular brown sugar	No	No	Not purchased	Price, Flavor/quality, Health benefits (e.g., organic, non-GMO)	Minimalist Design	2	2	Gold	2	No	2	5	5	Minimalistic Design , Transparent Packaging , Culturally symbolic design , Brand Trust and Storytelling	3	Uncertain	4	No	Local products with Chinese certifications	2	Yes	4	4
49	微信	18 - 24 years old	Male	Wuxi	100,000 – 200,000	Postgraduate or professional degree	Rarely	Rock sugar, white sugar, black sugar	No	No	Not purchased	Price, Brand Reputation, Health benefits (e.g., organic, non-GMO), Country of Origin	Minimalist Design	3	2	Red	5	No	4	1	2	Metallic Colors (Gold/Silver) , Minimalistic Design , Transparent Packaging	4	Uncertain	4	Sometimes	Imported products with international certifications (e.g., organic, fair trade)	1	No	3	4
50	微信	18 - 24 years old	Female	Ningbo	< 200,000	Postgraduate or professional degree	Rarely	confectionery	No	No	Not purchased	Price, Brand Reputation, Flavor/Quality	Minimalist Design	3	4	Red, gold, white	2	Yes	4	4	4	Metallic Colors (Gold/Silver) , Minimalistic Design , Premium material packaging (e.g., glass, premium paper , Culturally symbolic design , Brand Trust and Storytelling	5	Yes	3	Sometimes	Imported products with international certifications (e.g., organic, fair trade)	3	Maybe	4	3
51	微信	18 - 24 years old	Female	Jiangxi, Ganzhou	>50,000	Postgraduate or professional degree	Rarely	White sugar	No	No	Tea (e.g., ginger tea, brown sugar water)	Packaging Design, Flavor/Quality, Health benefits (e.g., organic, non-GMO)	Minimalist Design	2	2	Green, purple	2	Yes	2	2	2	Premium material packaging (e.g., glass, premium paper	2	Yes	2	Yes	Imported products with international certifications (e.g., organic, fair trade)	2	Yes	2	2
52	微信	18 - 24 years old	Female	Wuxi	100,000 – 200,000	Postgraduate or professional degree	Rarely	White sugar, regular brown sugar	No	Yes	Not purchased	Price, Brand Reputation, Packaging Design, Flavor/Quality, Health benefits (e.g., organic, non-GMO)	Modern design	3	4	Red, gold, purple,white, blue	4	No	4	1	3	Metallic Colors (Gold/Silver) , Minimalistic Design , Premium material packaging (e.g., glass, premium paper	2	Uncertain	2	Sometimes	Local products with Chinese certifications	2	Yes	3	3
53	微信	18 - 24 years old	Female	Beijing	< 200,000	Postgraduate or professional degree	Rarely	confectionery	No	Yes	Tea (e.g., ginger tea, brown sugar water)	Price, Brand Reputation, Packaging/visual appeal	Modern design	2	3	White	3	No	4	2	3	Minimalistic Design , Transparent Packaging , Brand Trust and Storytelling	1	Uncertain	4	No	Imported products with international certifications (e.g., organic, fair trade)	3	Maybe	2	3
54	微信	25 - 34 years old	Female	Wuxi	100,000 – 200,000	Postgraduate or professional degree	Monthly	Rock Sugar, Regular brown sugar	Uncertain	Yes	Tea (e.g., ginger tea, brown sugar water)	Price, Flavor/Quality, Health benefits (e.g., organic, non-GMO)	Minimalist Design	3	3	Gold, black	3	Yes	4	3	4	Minimalistic Design , Premium material packaging (e.g., glass, premium paper , Transparent Packaging , Brand Trust and Storytelling	4	Uncertain	3	Sometimes	Imported products with international certifications (e.g., organic, fair trade)	3	Yes	4	4
55	企业微信	18 - 24 years old	Female	Wuxi	100,000 – 200,000	Undergraduate	Monthly	White sugar, regular brown sugar	No	No	Not purchased	Price, Brand Reputation, Flavor/Quality	Minimalist Design	3	3	Gold	4	No	5	4	2	Minimalistic Design , Premium material packaging (e.g., glass, premium paper , Transparent Packaging	3	Yes	3	Sometimes	Imported products with international certifications (e.g., organic, fair trade)	2	Yes	5	5
56	微信	18 - 24 years old	Female	Guangzhou	100,000 – 200,000	Postgraduate or professional degree	Monthly	Rock sugar, white sugar, black sugar	No	Yes	Tea (e.g., ginger tea, brown sugar water)	Price, Brand Reputation, Flavor/Quality	Minimalist Design	3	4	Gold, purple	4	Yes	4	3	3	Minimalistic Design , Premium material packaging (e.g., glass, premium paper , Brand Trust and Storytelling	4	Yes	4	Yes	Imported products with international certifications (e.g., organic, fair trade)	4	Yes	4	4
57	微信	18 - 24 years old	Female	Wuxi	100,000 – 200,000	Postgraduate or professional degree	Rarely	Rock sugar, white sugar, regular brown sugar	No	Yes	Tea (e.g., ginger tea, brown sugar water)	Price, Flavor/Quality, Health benefits (e.g., organic, non-GMO)	Minimalist Design	3	4	Gold, green, black, white	4	No	4	3	4	Minimalistic Design , Premium material packaging (e.g., glass, premium paper , Transparent Packaging , Culturally symbolic design , Brand Trust and Storytelling	3	Yes	3	Sometimes	Sustainability and digitalization	4	Yes	4	4
58	微信	18 - 24 years old	Male	Wuxi	>50,000	Postgraduate or professional degree	Rarely	White sugar	No	No	Not purchased	Price, Brand Reputation	Minimalist Design	2	2	White	1	No	2	2	2	Minimalistic Design	2	No	2	Sometimes	Imported products with international certifications (e.g., organic, fair trade)	2	Yes	2	2
59	企业微信	18 - 24 years old	Male	Anhui	100,000 – 200,000	Undergraduate	Rarely	Rock sugar	No	No	Not purchased	Brand Reputation, Packaging Design	Minimalist Design	1	1	White	4	Yes	4	4	3	Minimalistic Design , Brand Trust and Storytelling	4	No	3	No	Local products with Chinese certifications	4	Yes	3	4
60	企业微信	18 - 24 years old	Male	Chengdu	>50,000	Undergraduate	Monthly	confectionery	Uncertain	No	Not purchased	Price, Flavor/Quality, Packaging/visual appeal	Modern design	2	4	White, blue	4	Yes	3	3	3	Minimalistic Design , Premium material packaging (e.g., glass, premium paper , Brand Trust and Storytelling	4	Uncertain	1	Sometimes	Sustainability and digitalization	4	Maybe	4	4
61	微信	18 - 24 years old	Male	Wuxi	100,000 – 200,000	Postgraduate or professional degree	Rarely	Zero - calorie sweetener	No	Yes	Tea (e.g., ginger tea, brown sugar water)	Price, Brand Reputation, Flavor/Quality	Minimalist Design	1	3	Red, gold, white, blue	5	No	3	3	2	Metallic Colors (Gold/Silver) , Minimalistic Design , Premium material packaging (e.g., glass, premium paper , Transparent Packaging , Culturally symbolic design , Brand Trust and Storytelling	2	Uncertain	2	Sometimes	Local products with Chinese certifications	2	Yes	2	2
62	企业微信	18 - 24 years old	Female	Shenzhen	>50,000	Undergraduate	Rarely	Rock sugar, white sugar	No	No	Not purchased	Packaging Design, Health benefits (e.g., organic, non-GMO)Certifications (e.g., organic, fair trade), Sustainability (e.g., eco-friendly packaging)	Modern design	3	3	Green, purple, black	1	Yes	3	4	4	Minimalistic Design , Premium material packaging (e.g., glass, premium paper , Transparent Packaging	3	Yes	3	No	Local products with Chinese certifications	3	Yes	3	3
63	微信	18 - 24 years old	Female	Wuxi	100,000 – 200,000	Postgraduate or professional degree	Rarely	Regular brown sugar	No	Yes	Not purchased	Certifications (e.g., organic, fair trade)	Traditional design	1	1	Red, black	1	Yes	2	2	2	Minimalistic Design	1	Yes	2	No	Sustainability and digitalization	2	Yes	3	3
64	微信	18 - 24 years old	Female	Wuxi	< 200,000	Postgraduate or professional degree	Weekly	White sugar	No	No	Not purchased	Price, Brand Reputation, Health benefits (e.g., organic, non-GMO)	Minimalist Design	3	4	White	3	No	3	3	3	Premium material packaging (e.g., glass, premium paper , Brand Trust and Storytelling	4	Yes	4	No	Local products with Chinese certifications	3	Maybe	3	4
65	微信	18 - 24 years old	Female	Yixing	100,000 – 200,000	Postgraduate or professional degree	Monthly	Rock sugar, white sugar, regular brown sugar, black sugar	No	No	Not purchased	Brand Reputation, Flavor/Quality, Health benefits (e.g., organic, non-GMO), Certifications (e.g., organic, fair trade), Sustainability (e.g., eco-friendly packaging)	Traditional design	2	4	Red, gold, green, white	4	Yes	4	4	4	Metallic Colors (Gold/Silver) , Minimalistic Design , Transparent Packaging , Brand Trust and Storytelling	4	Yes	2	Yes	Imported products with international certifications (e.g., organic, fair trade)	2	Yes	4	4
66	企业微信	18 - 24 years old	Female	Wuxi	< 200,000	Undergraduate	Rarely	Barely buy	No	No	Not purchased	Brand Reputation, Packaging/visual appeal Flavor/Quality	Minimalist Design	1	2	Gold, black, white	5	Yes	4	4	4	Minimalistic Design , Premium material packaging (e.g., glass, premium paper , Culturally symbolic design , Brand Trust and Storytelling	3	Yes	5	Sometimes	Imported products with international certifications (e.g., organic, fair trade)	3	Yes	4	5
67	企业微信	18 - 24 years old	Female	Wuxi	< 200,000	Undergraduate	Rarely	White sugar, regular brown sugar	No	No	Not purchased	Price, Brand Reputation, Packaging/visual appeal Flavor/Quality, Health benefits (e.g., organic, non-GMO), Country of Origin, Sustainability (e.g., eco-friendly packaging)	Traditional design	3	4	Red, gold, black, blue	5	Yes	3	4	4	Metallic Colors (Gold/Silver) , Premium material packaging (e.g., glass, premium paper , Culturally symbolic design , Brand Trust and Storytelling	4	Yes	4	Sometimes	Imported products with international certifications (e.g., organic, fair trade)	3	Yes	4	4
68	微信	18 - 24 years old	Prefer not to disclose	Wuxi	< 200,000	Postgraduate or professional degree	Rarely	Rock sugar, white sugar, regular brown sugar	No	No	Not purchased	Price, Health benefits (e.g., organic, non-GMO), Certifications (e.g., organic, fair trade)	Minimalist Design	1	2	White	2	No	1	2	3	Minimalistic Design , Brand Trust and Storytelling	2	Uncertain	1	Sometimes	Imported products with international certifications (e.g., organic, fair trade)	3	Yes	5	5
69	微信	18 - 24 years old	Female	Wuxi	100,000 – 200,000	Undergraduate	Rarely	Rock Sugar, Regular brown sugar	No	No	Not purchased	Price, Brand Reputation, Packaging/visual appeal, Flavor/Quality	Minimalist Design	2	5	Green, blue	3	Yes	4	3	4	Minimalistic Design , Brand Trust and Storytelling	4	Yes	3	Sometimes	Local products with Chinese certifications	4	Yes	3	4
70	企业微信	18 - 24 years old	Male	Shanghai	100,000 – 200,000	Undergraduate	Never	don’t buy	No	No	Not purchased	Packaging/visual appeal, Health benefits (e.g., organic, non-GMO), Certifications (e.g., organic, fair trade),	Modern design	3	4	Gold	4	No	4	4	4	Culturally symbolic design , Brand Trust and Storytelling	4	Yes	3	Sometimes	Imported products with international certifications (e.g., organic, fair trade)	3	Yes	3	3
71	企业微信	18 - 24 years old	Female	Wuxi	>50,000	Undergraduate	Monthly	White sugar	No	No	Not purchased	Price, Brand Reputation, Flavor/Quality	Traditional design	2	5	White, blue	3	No	3	3	5	Minimalistic Design , Brand Trust and Storytelling	4	Yes	4	Sometimes	Local products with Chinese certifications	4	Maybe	3	4
72	企业微信	18 - 24 years old	Prefer not to disclose	Shanghai	< 200,000	Postgraduate or professional degree	Never	Rock sugar, white sugar, regular brown sugar, Yellow sugar/Golden sugar (e.g., Taikoo Golden Sachets, Demerara yellow sugar), black sugar	Uncertain	Yes	Not purchased	Packaging Design	Traditional design	1	1	Red	3	Yes	1	1	1	Metallic Colors (Gold/Silver)	3	No	3	Yes	Imported products with international certifications (e.g., organic, fair trade)	3	Maybe	3	1
73	微信	18 - 24 years old	Female	Wuxi	>50,000	Postgraduate or professional degree	Monthly	Regular brown sugar	No	Yes	Tea (e.g., ginger tea, brown sugar water)	Price, Packaging Design, Flavor/Quality	Minimalist Design	3	3	Red, gold, purple, black	5	Yes	5	4	5	Metallic Colors (Gold/Silver) , Minimalistic Design , Premium material packaging (e.g., glass, premium paper , Culturally symbolic design	2	No	5	Sometimes	Sustainability and digitalization	4	Yes	4	4
74	微信	18 - 24 years old	Female	Wuxi	< 200,000	Undergraduate	Weekly	confectionery	No	Yes	Baking	Price, Brand Reputation, Flavor/Quality, Health benefits (e.g., organic, non-GMO)	Minimalist Design	3	3	Gold, black,white, blue	5	No	4	2	3	Minimalistic Design , Premium material packaging (e.g., glass, premium paper , Brand Trust and Storytelling	4	Yes	4	No	Imported products with international certifications (e.g., organic, fair trade)	3	Yes	2	4
75	企业微信	18 - 24 years old	Female	Wuxi	>50,000	Undergraduate	Weekly	confectionery	No	Yes	Tea (e.g., ginger tea, brown sugar water)	Price, Brand Reputation, Flavor/Quality	Modern design	3	4	Gold, white	4	Yes	3	5	4	Metallic Colors (Gold/Silver) , Minimalistic Design , Transparent Packaging	4	Yes	2	Yes	Local products with Chinese certifications	4	Yes	2	3
76	企业微信	18 - 24 years old	Female	Wuxi	100,000 – 200,000	Undergraduate	Rarely	Rock sugar	No	No	Not purchased	Price, Brand Reputation, Health benefits (e.g., organic, non-GMO)	Traditional design	3	3	Red, gold, white	4	Yes	4	4	5	Minimalistic Design , Culturally symbolic design , Brand Trust and Storytelling	5	Yes	5	Sometimes	Local products with Chinese certifications	3	Yes	4	4
77	企业微信	18 - 24 years old	Female	Wuxi	< 200,000	Undergraduate	Monthly	White sugar	No	Yes	Tea (e.g., ginger tea, brown sugar water)	Price, Brand Reputation, Packaging Design	Minimalist Design	3	3	Gold	3	No	3	3	3	Metallic Colors (Gold/Silver) , Premium material packaging (e.g., glass, premium paper	3	Yes	4	Sometimes	Imported products with international certifications (e.g., organic, fair trade)	3	Yes	3	3
78	企业微信	18 - 24 years old	Female	Wuxi	100,000 – 200,000	Undergraduate	Weekly	White sugar	Uncertain	No	Not purchased	Price, Brand Reputation, Packaging Design, Flavor/Quality	Modern design	4	4	Gold, purple, white	4	Yes	5	1	3	Minimalistic Design , Premium material packaging (e.g., glass, premium paper , Brand Trust and Storytelling	3	Yes	3	Yes	Imported products with international certifications (e.g., organic, fair trade)	3	Yes	3	4
79	微信	18 - 24 years old	Female	Wuxi	>50,000	Postgraduate or professional degree	Rarely	White sugar	No	No	Not purchased	Brand Reputation, Packaging Design, Health benefits (e.g., organic, non-GMO)	Minimalist Design	3	3	Gold	5	Yes	4	4	4	Minimalistic Design	4	Yes	5	Yes	Imported products with international certifications (e.g., organic, fair trade)	5	Yes	5	5
80	微信	25 - 34 years old	Female	Wuxi	< 200,000	Postgraduate or professional degree	Rarely	confectionery	No	No	Not purchased	Price, Flavor/Quality	Vibrant design	4	4	Red	4	No	4	3	3	Metallic Colors (Gold/Silver) , Premium material packaging (e.g., glass, premium paper	2	Uncertain	3	No	Local products with Chinese certifications	4	Yes	4	4
81	微信	18 - 24 years old	Female	Wuxi	100,000 – 200,000	Postgraduate or professional degree	Monthly	Rock sugar, white sugar, regular brown sugar, confectionery	No	No	Not purchased	Price, Brand Reputation, Packaging Design, Flavor/Quality, Health benefits (e.g., organic, non-GMO), Certifications (e.g., organic, fair trade), Sustainability (e.g., eco-friendly packaging)	Minimalist Design	3	4	Gold, green, white	5	Yes	5	3	4	Minimalistic Design , Premium material packaging (e.g., glass, premium paper , Transparent Packaging , Culturally symbolic design , Brand Trust and Storytelling	5	Uncertain	4	Sometimes	Imported products with international certifications (e.g., organic, fair trade)	4	Maybe	4	5
82	企业微信	18 - 24 years old	Female	Wuxi	>50,000	Undergraduate	Rarely	Regular brown sugar	No	Yes	Tea (e.g., ginger tea, brown sugar water)	Price, Flavor/Quality, Health benefits (e.g., organic, non-GMO)	Minimalist Design	3	5	Black, white	4	Yes	4	3	4	Metallic Colors (Gold/Silver) , Minimalistic Design	2	Uncertain	4	Sometimes	Imported products with international certifications (e.g., organic, fair trade)	3	Yes	3	4
83	微信	18 - 24 years old	Female	Wuxi	>50,000	Postgraduate or professional degree	Rarely	confectionery	Uncertain	No	Not purchased	Price, Flavor/Quality, Health benefits (e.g., organic, non-GMO)	Minimalist Design	2	4	Gold	4	No	3	4	4	Minimalistic Design , Culturally symbolic design , Brand Trust and Storytelling	3	Uncertain	3	No	Imported products with international certifications (e.g., organic, fair trade)	4	Maybe	3	4
84	微信	25 - 34 years old	Female	Wuxi	>50,000	Postgraduate or professional degree	Rarely	White sugar, regular brown sugar	Uncertain	No	Not purchased	Price, Brand Reputation, Flavor/Quality, Health benefits (e.g., organic, non-GMO)	Modern design	2	2	Gold, purple, blue	2	Yes	3	2	4	Metallic Colors (Gold/Silver) , Brand Trust and Storytelling	4	Yes	3	No	Local products with Chinese certifications	3	Yes	4	4
85	微信	18 - 24 years old	Female	Wuxi	>50,000	Undergraduate	Rarely	Regular brown sugar	No	Yes	Tea (e.g., ginger tea, brown sugar water)	Price, Brand Reputation, Packaging Design, Flavor/Quality	Modern design	4	5	Gold	3	No	4	4	4	Minimalistic Design , Premium material packaging (e.g., glass, premium paper , Brand Trust and Storytelling	3	Yes	4	Yes	Imported products with international certifications (e.g., organic, fair trade)	4	Yes	4	4
86	微信	18 - 24 years old	Female	Guangzhou	>50,000	Undergraduate	Monthly	Regular brown sugar, Yellow sugar/Golden sugar (e.g., Taikoo Golden Sachets, Demerara yellow sugar)	Yes	No	baking, Cooking (e.g., braised pork, sweet and sour ribs)	Packaging Design, Health benefits (e.g., organic, non-GMO), Country of Origin, Certifications (e.g., organic, fair trade)	Minimalist Design	2	3	Green, white	4	Yes	3	3	4	Transparent Packaging , Brand Trust and Storytelling	3	Uncertain	3	Sometimes	Local products with Chinese certifications	3	Maybe	3	3
87	微信	25 - 34 years old	Male	Shanghai	< 200,000	Postgraduate or professional degree	Monthly	Rock sugar, white sugar	No	No	baking, Tea (e.g., ginger tea, brown sugar water)	Brand Reputation, Packaging Design, Flavor/Quality, Health benefits (e.g., organic, non-GMO), Country of Origin, Sustainability (e.g., eco-friendly packaging)	Modern design	3	4	Red, gold, white	2	Yes	3	4	3	Minimalistic Design , Premium material packaging (e.g., glass, premium paper , Culturally symbolic design , Brand Trust and Storytelling	3	Yes	4	Yes	Imported products with international certifications (e.g., organic, fair trade)	3	Yes	4	4
88	微信	18 - 24 years old	Female	Shanghai	< 200,000	Postgraduate or professional degree	Rarely	White sugar, regular brown sugar	No	No	Not purchased	Price, Flavor/Quality, Packaging/visual appeal	Modern design	3	4	Gold	4	Yes	4	4	4	Metallic Colors (Gold/Silver) , Minimalistic Design , Premium material packaging (e.g., glass, premium paper , Brand Trust and Storytelling	3	Uncertain	4	Sometimes	Imported products with international certifications (e.g., organic, fair trade)	2	Maybe	3	4
89	微信	45 - 54 years old	Male	Suzhou	100,000 – 200,000	Postgraduate or professional degree	Rarely	Rock sugar, white sugar	No	Yes	Tea (e.g., ginger tea, brown sugar water)	Price, Brand Reputation, Health benefits (e.g., organic, non-GMO), Visual Design and Packaging Preferences	Modern design	4	5	Red, gold	4	No	3	4	4	Metallic Colors (Gold/Silver) , Premium material packaging (e.g., glass, premium paper , Transparent Packaging , Culturally symbolic design , Brand Trust and Storytelling	4	Yes	4	Sometimes	Imported products with international certifications (e.g., organic, fair trade)	4	Yes	4	4
90	微信	25 - 34 years old	Female	Wuxi	100,000 – 200,000	Postgraduate or professional degree	Monthly	confectionery	No	No	Not purchased	Price, Flavor/Quality, Packaging/visual appeal	Traditional design	5	5	Red	5	No	5	3	4	Minimalistic Design , Premium material packaging (e.g., glass, premium paper , Transparent Packaging	1	Uncertain	1	No	Local products with Chinese certifications	5	Yes	5	5
91	微信	45 - 54 years old	Female	Shanghai	100,000 – 200,000	Postgraduate or professional degree	Rarely	White sugar	No	No	Not purchased	Price, Brand Reputation, Health benefits (e.g., organic, non-GMO)	Minimalist Design	1	1	Red, gold, black	5	Yes	4	1	4	Metallic Colors (Gold/Silver) , Minimalistic Design , Premium material packaging (e.g., glass, premium paper	2	No	5	Yes	Imported products with international certifications (e.g., organic, fair trade)	1	Yes	1	1
92	微信	25 - 34 years old	Male	Wuxi	100,000 – 200,000	Undergraduate	Monthly	White sugar	No	No	Cooking (e.g., braised pork, sweet and sour ribs)	Price	Traditional design	2	2	Red	2	Yes	4	2	4	Minimalistic Design	4	No	4	No	Local products with Chinese certifications	2	Yes	2	4
93	微信	25 - 34 years old	Female	Wuxi	< 200,000	Postgraduate or professional degree	Rarely	Rock sugar, white sugar, regular brown sugar	No	Yes	Not purchased	Price, Brand Reputation, Packaging Design	Modern design	4	5	White	3	No	3	4	3	Minimalistic Design , Premium material packaging (e.g., glass, premium paper	4	Yes	4	No	Sustainability and digitalization	5	Yes	3	5
94	微信	25 - 34 years old	Female	Wuxi	< 200,000	Postgraduate or professional degree	Rarely	White sugar	No	Yes	Not purchased	Price, Flavor/Quality, Certification Marks (such as Organic, Fair Trade)	Modern design	2	3	Gold	3	Yes	4	4	5	Minimalistic Design , Culturally symbolic design , Brand Trust and Storytelling	5	Yes	3	Sometimes	Imported products with international certifications (e.g., organic, fair trade)	4	Maybe	3	4
95	微信	25 - 34 years old	Female	Wuxi	100,000 – 200,000	Postgraduate or professional degree	Monthly	Regular brown sugar	No	No	Not purchased	Packaging Design, Flavor/Quality	Minimalist Design	4	4	Gold	4	No	4	4	5	Premium material packaging (e.g., glass, premium paper , Culturally symbolic design , Brand Trust and Storytelling	4	Yes	3	No	Local products with Chinese certifications	5	Yes	5	5
96	微信	25 - 34 years old	Female	Wuxi	< 200,000	Postgraduate or professional degree	Rarely	Rock sugar, white sugar, regular brown sugar	No	No	Not purchased	Price, Brand Reputation, Flavor/Quality	Traditional design	3	5	Gold, green, white, blue	4	Yes	3	4	4	Metallic Colors (Gold/Silver) , Transparent Packaging , Culturally symbolic design	4	Yes	4	No	Imported products with international certifications (e.g., organic, fair trade)	3	Yes	5	5
97	微信	25 - 34 years old	Male	Wuxi	>50,000	Postgraduate or professional degree	Monthly	White sugar, regular brown sugar	No	No	Not purchased	Price, Brand Reputation, Packaging Design, Flavor/Quality	Minimalist Design	3	3	Gold, white	2	No	4	3	3	Minimalistic Design , Brand Trust and Storytelling	3	Uncertain	3	Yes	Imported products with international certifications (e.g., organic, fair trade)	4	Yes	4	3
98	微信	18 - 24 years old	Female	Wuxi	>50,000	Undergraduate	Monthly	White sugar, regular brown sugar	No	No	baking, Cooking (e.g., braised pork, sweet and sour ribs), Tea (e.g., ginger tea, brown sugar water)	Price, Brand Reputation, Flavor/Quality, Health benefits (e.g., organic, non-GMO), Certifications (e.g., organic, fair trade)	Vibrant design	5	5	Gold, green, black, white	5	Yes	2	2	4	Metallic Colors (Gold/Silver) , Premium material packaging (e.g., glass, premium paper , Transparent Packaging , Culturally symbolic design , Brand Trust and Storytelling	3	Yes	5	No	Imported products with international certifications (e.g., organic, fair trade)	2	Yes	4	5
99	微信	25 - 34 years old	Male	Shanghai	< 200,000	Undergraduate	Rarely	Rock sugar, white sugar, regular brown sugar	No	Yes	Not purchased	Brand Reputation, Flavor/Quality	Traditional design	2	3	White	2	No	2	1	2	Minimalistic design, Premium material packaging (e.g., glass, premium paper), Transparent packaging	4	Uncertain	5	No	Imported products with international certifications (e.g., organic, fair trade)	1	Maybe	4	3
100	微信	18 - 24 years old	Female	Wuxi	>50,000	Undergraduate	Monthly	Rock sugar, white sugar, regular brown sugar	No	Yes	baking, Tea (e.g., ginger tea, brown sugar water)	Price, Brand Reputation, Flavor/Quality	Minimalist Design	5	5	Red, gold	5	Yes	4	1	5	Metallic colors (gold, silver) , Minimalistic design, Transparent packaging	4	Uncertain	5	Yes	Imported products with international certifications (e.g., organic, fair trade)	5	Yes	5	5
101	微信	45 - 54 years old	Female	Wuxi	< 200,000	Postgraduate or professional degree	Rarely	Regular brown sugar, Yellow sugar/Golden sugar (e.g., Taikoo Golden Sachets, Demerara yellow sugar)	Uncertain	Yes	baking, Cooking (e.g., braised pork, sweet and sour ribs)	Flavor/Quality, Certifications (e.g., organic, fair trade), Sustainability (e.g., eco-friendly packaging)	Traditional design	1	5	Gold, white	1	No	1	3	5	Metallic colors (gold, silver), Culturally symbolic design , Brand Trust and Storytelling	5	Yes	5	Sometimes	Imported products with international certifications (e.g., organic, fair trade)	5	Maybe	4	5
102	微信	35 - 44 years old	Female	Wuxi	100,000 – 200,000	Undergraduate	Rarely	Rock sugar, white sugar	No	Yes	Not purchased	Price, Brand Reputation, Flavor/Quality, Health benefits (e.g., organic, non-GMO)	Minimalist Design	2	3	Gold, white	4	No	5	4	4	Metallic colors (gold, silver), Minimalistic design	3	Yes	3	Yes	Imported products with international certifications (e.g., organic, fair trade)	4	Yes	4	4
103	微信	18 - 24 years old	Female	Wuxi	>50,000	Undergraduate	Rarely	Yellow sugar/Golden sugar (e.g., Taikoo Golden Sachets, Demerara yellow sugar)	No	No	Cooking (e.g., braised pork, sweet and sour ribs)	Price, Flavor/Quality, Health benefits (e.g., organic, non-GMO)	Minimalist Design	3	3	Gold	3	Yes	2	4	5	Culturally symbolic design, Brand Trust and Storytelling	4	Yes	2	Yes	Imported products with international certifications (e.g., organic, fair trade)	5	Yes	2	2
104	微信	35 - 44 years old	Male	上海	< 200,000	Postgraduate or professional degree	Rarely	Rock sugar, white sugar	Uncertain	Yes	Not purchased	Brand Reputation, Certifications (e.g., organic, fair trade), Packaging/visual appeal	Minimalist Design	2	3	White	3	Yes	3	1	4	Minimalistic design, Culturally symbolic design, Brand Trust and Storytelling	4	Uncertain	2	Yes	Imported products with international certifications (e.g., organic, fair trade)	1	Yes	4	4
105	微信	35 - 44 years old	Male	Wuxi	100,000 – 200,000	Undergraduate	Rarely	Rock sugar, white sugar	No	Yes	Not purchased	Price, Brand Reputation, Flavor/Quality, Health benefits (e.g., organic, non-GMO)	Traditional design	4	4	Red, gold, black	3	Yes	2	4	4	Metallic colors (gold, silver) , Minimalistic design, Culturally symbolic design , Brand Trust and Storytelling	4	Yes	3	Sometimes	Local products with Chinese certifications	4	Yes	3	3
106	微信	35 - 44 years old	Male	Tianjin	100,000 – 200,000	Postgraduate or professional degree	Monthly	White sugar, regular brown sugar	No	Yes	Not purchased	Price, Brand Reputation, Flavor/Quality	Minimalist Design	3	3	Gold, black, white	3	Yes	5	3	3	Minimalistic design, Culturally symbolic design	5	Uncertain	5	Yes	Local products with Chinese certifications	3	Yes	3	3
